# Supplementary material for: The role of cannabinoid agonists and antagonists on folliculogenesis, and evolutionary events in mouse ovary
Source: Research Square preprint supplement (doi:10.21203/rs.3.rs-5351873/v1), 2024-11-12
Supplement: Supplementary file 1 [file 1ad73981ea0db36d0ba60e78.docx]

|  | Group | Dose | Drug solvent | Drug characteristics |
| --- | --- | --- | --- | --- |
| 1 | W102 (WIN 55212-2) (1) | 10 mg/kg | 12 mg/ml (DMSO) | CB1/CB2 agonist |
| 2 | AM 251 (A6226) (2) | 10 mg/kg | <10 mg/ml (DMSO) | CB1 antagonist |
| 3 | AM 630 (SML0327) (3, 4) | 5 mg/kg | <5 mg/ml (DMSO) | CB2 antagonist |
| 4 | A9719 (ACEA) (5) | 5 mg/kg | <10 mg/ml (DMSO) | CB1 agonist |
| 5 | GW405833 (G1421) (6) | 10 mg/kg | <10 mg/ml (DMSO) | CB2 agonist |
| 6 | W102 + AM 251 | 10 mg/kg + 10 mg/kg |  |  |
| 7 | W102 + AM630 | 10 mg/kg + 5 mg/kg |  |  |
| 8 | GW405833 + AM251 | 10 mg/kg + 10 mg/kg |  |  |
| 9 | A9719 + AM 630 | 5 mg/kg + 5 mg/kg |  |  |
| 10 | Vehicle (DMSO) |  |  |  |

1. Greish K, Mathur A, Al Zahrani R, Elkaissi S, Al Jishi M, Nazzal O, et al. Synthetic cannabinoids nano-micelles for the management of triple negative breast cancer. Journal of controlled release : official journal of the Controlled Release Society. 2018;291:184-95.

2. Gatley SJ, Gifford AN, Volkow ND, Lan R, Makriyannis A. 123I-labeled AM251: a radioiodinated ligand which binds in vivo to mouse brain cannabinoid CB1 receptors. European journal of pharmacology. 1996;307(3):331-8.

3. Sufian MS, Amin MR, Ali DW. Early suppression of the endocannabinoid degrading enzymes FAAH and MAGL alters locomotor development in zebrafish. Journal of Experimental Biology. 2021;224(16).

4. Pertwee R, Griffin G, Fernando S, Li X, Hill A, Makriyannis A. AM630, a competitive cannabinoid receptor antagonist. Life Sciences. 1995;56(23):1949-55.

5. Asiri YI, Fung T, Schwarz SKW, Asseri KA, Welch ID, Schuppli CA, et al. An Intraplantar Hypertonic Saline Assay in Mice for Rapid Screening of Analgesics. Anesthesia and analgesia. 2018;127(2):548-55.

6. Li AL, Carey LM, Mackie K, Hohmann AG. Cannabinoid CB(2) Agonist GW405833 Suppresses Inflammatory and Neuropathic Pain through a CB(1) Mechanism that is Independent of CB(2) Receptors in Mice. The Journal of pharmacology and experimental therapeutics. 2017;362(2):296-305.
