# Supplementary material for: The role of cannabinoid agonists and antagonists on folliculogenesis, and evolutionary events in mouse ovary
Source: Research Square preprint supplement (doi:10.21203/rs.3.rs-5351873/v1), 2024-11-12
Supplement: Supplementary file 2 [file 522da5d67c955d602e20b9e3.docx]

S3. The number of micro vessels, weight and volume of ovaries in different groups and the level of estradiol hormone in different groups. (a) significantly different compared with w102, (b) significantly different compared with am251, (c) significantly different compared with am630, (d) significantly different compared with a9719, (e ) significantly different compared with g1421, (f) significantly different compared with w102+am251, (g) significantly different compared with w102+am630, (h) significantly different compared with g1421+am251, (i) significantly different compared with a9719+am630, (#) significantly different compared with DMSO, (*) significancy with all groups; P<0.05.

| Groups | MV | weight | Volume | Estradiol |
| --- | --- | --- | --- | --- |
| w102 | 20.52 ± 19.2 | 0.004 ± 0.001d, f, g, h | 3.36 ± 0.4 | 25.8 ± 6.2# |
| am251 | 33.28 ± 13.8* | 0.003 ± 0.001 | 15.30 ± 2.4 | 28.5 ± 9.3* |
| am630 | 20.03 ± 6.1 | 0.004 ± 0.001 d, f, g, h | 16.81 ± 1.7d, f, g | 34.8 ± 11.9a, d, e, f, g, h, I, # |
| a9719 | 12.25 ± 5.1 | 0.003 ± 0.001i | 11.72 ± 3.8 | 23.3 ± 9.3* |
| g1421 | 24.73 ± 11.1d, # | 0.003 ± 0.001 | 15.55 ± 2.1 | 25.6 ± 5.1* |
| w102+am251 | 18.21 ± 8.4 | 0.002 ± 0.0004 i | 11.31 ± 2.7 | 20 ± 8* |
| w102+am630 | 18.98 ± 8.6 | 0.003 ± 0.0004 i | 11.42 ± 1.4 | 22 ± 8.4* |
| g1421+am251 | 18.10 ± 3.5 | 0.003 ± 0.0004 | 16.05 ± 3.1 | 22.3 ± 13* |
| a9719+am630 | 21.31 ± 10 | 0.004 ± 0.0004 | 15.68 ± 2.7d, g | 14.2 ± 3.2a, b, d |
| dmso | 11.75 ± 5.3 | 0.005 ± 0.0004* | 13.47 ± 3.8 | 13.3 ± 4.6 |
