# Supplementary material for: The role of cannabinoid agonists and antagonists on folliculogenesis, and evolutionary events in mouse ovary
Source: Research Square preprint supplement (doi:10.21203/rs.3.rs-5351873/v1), 2024-11-12
Supplement: Supplementary file 3 [file 634c3c409adeda7f5fb96cfc.docx]

S2. Number of primary, secondary, preantral and antral follicles and luteal bodies in different groups. (a) significant difference compared with w102, (b) significant difference compared with am251, (c) significant difference compared with am630, (d) significant difference compared with a9719, (e ) significant difference compared with g1421, (f) significant difference compared with w102+am251, (g) significant difference compared with w102+am630, (h) significant difference compared with g1421+am251, (i) significant difference compared with a9719+am630, (#) significant difference compared with DMSO; P<0.05.

| **Groups** | **primary F** | **secondary F** | **preantral F** | **antral F** | **LB** |
| --- | --- | --- | --- | --- | --- |
| w102 | 4.17 ± 3.8# | 14.50 ± 5.3 | 8.17 ± 4.5 | 1.17 ± 1.9 | 1.94 ± 1.5e, f |
| am251 | 3.00 ± 4.1 | 16.60 ± 3.8g | 11.20 ± 2.3g, h, # | 0.60 ± 0.8 | 2.90 ± 1.3 |
| am630 | 4.17 ± 6.1# | 10.40 ± 6.2b, f | 14.40 ± 8.2a, f, g, h, I, # | 2.20 ± 1.6# | 2.83 ± 1.8 |
| a9719 | 2.19 ± 2.3 | 9.20 ± 3.1a, b, f, # | 9.40 ± 2.4g, h, # | 1.80 ± 2.2# | 2.90 ± 1 |
| g1421 | 1.50 ± 1.8 | 12.17 ± 4.8f | 9.83 ± 4.4 g, h, # | 1.17 ± 1.3 | 4.25 ± 1.4g, h, # |
| w102+am251 | 2.00 ± 2 | 17.33 ± 4.2g | 6.83 ± 6.9 | 1.17 ± 1.9 | 3.85 ± 1.9# |
| w102+am630 | 1.00 ± 0.6 | 11.20 ± 3.2 | 4.20 ± 1 | 1.80 ± 1.9# | 2.48 ± 1.2 |
| g1421+am251 | 2.80 ± 3.1 | 14.00 ± 4.4 | 4.20 ± 2.5 | 1.40 ± 1 | 2.45 ± 1.1 |
| a9719+am630 | 2.67 ± 1.4 | 20.00 ± 3.6a, c, d, e, g, h, # | 6.17 ± 3.8 | 0.83 ± 0.8 | 3.40 ± 1# |
| dmso | 0.33 ± 0.5 | 14.67 ± 1.4 | 3.33 ± 1.4 | 0.00 | 1.59 ± 0.7 |
