# Supplementary material for: The role of cannabinoid agonists and antagonists on folliculogenesis, and evolutionary events in mouse ovary
Source: Research Square preprint supplement (doi:10.21203/rs.3.rs-5351873/v1), 2024-11-12
Supplement: Supplementary file 4 [file 734f3a85bcc796e59f31927f.docx]

**S1.** Expression of NAPE-PLD and FAAH genes in the ovary of different groups. (*) significantly different compared with all groups, P<0.05.

| **Groups** | **NAPE_PLD** | **FAAH** |
| --- | --- | --- |
| w102 | 16.67 ± 2.9* | 0.22 ± 0.1 |
| am251 | 0.72 ± 0.1 | 0.29 ± 0.1 |
| am630 | 2.76 ± 0.0 | 0.70 ± 0.1 |
| a9719 | 2.43 ± 1 | 0.14 ± 0.07 |
| g1421 | 0.43 ± 0.3 | 0.05 ± 0.0 |
| w102+am251 | 0.27 ± 0.1 | 8.37 ± 3.9* |
| w102+am630 | 0.44 ± 0.2 | 0.13 ± 0.06 |
| g1421+am251 | 0.55 ± 0.2 | 8.34 ± 0.5* |
| a9719+am630 | 8.99 ± 0.9* | 3.59 ± 1 |
| dmso | 1.00 | 1.00 |
